# Supplementary material
Source: publisher figshare collection journal article supplement (https://frontiersin.figshare.com/ndownloader/files/24974573)
Supplement: Supplementary file 1 [file 24974573]

**Interview Protocol for Farmers**

**Overall Research Questions**

1. What are Iowa farmers' perspectives on the effectiveness of current federal and state agri-environmental programs?
2. How effective are current agricultural soil and water conservation policies and programs?
   1. What are the strengths and weaknesses of working lands programs?
      1. Conservation Stewardship Program (CSP)
      2. Environmental Quality Incentives Program (EQIP)
      3. Conservation compliance
   2. What are the strengths and weaknesses of land reserve programs
      1. Conservation Reserve Program (CRP)
      2. Conservation Reserve Enhancement Program (CREP)
3. To what extent current conservation policy and program measures help to bridge the gap between the short-term pressures to make profit margins and long-term imperatives of conserving or improving productivity?

Interview Questions:

1. To what extent the following programs have been effective:

Working lands programs:

- - Conservation Stewardship Program (CSP)
- Have you participated in CSP? If so, what did you like about the program? What could be improved?
- If you haven't participated, why not? What are your thoughts on the strengths and weaknesses of the program?
- Is CSP participation in Iowa high enough to make major state-level differences in soil health, water quality, and other indicators of sustainability?
- Environmental Quality Incentives Program (EQIP)
- Have you participated in EQIP? If so, what did you like about the program? What could be improved?
- If you haven't participated, why not? What are your thoughts on the strengths and weaknesses of the program?
- Is EQIP participation in Iowa high enough to achieve major state­ level improvements in reducing nutrient loss from livestock operations, improving pasture management, and reducing erosion?
- Conservation Compliance (CC)
- Do you have any land to which conservation compliance applies? If so, what do you like about conservation compliance and what could be improved?
- What are your thoughts on conservation compliance being expanded to all cropland?
- To what extent do you think Iowa's HEL croplands under conservation plans sufficient to meet the program's erosion prevention goals?

Land retirement programs:

- Conservation Reserve Program (CRP)
- Have you participated in CRP? If so, what did you like about the program? What could be improved?
- If you haven't participated, why not? What are your thoughts on the strengths and weaknesses of the program?
- What's your opinion about the effectiveness of CRP?
- Do you think more land should be enrolled in CRP?
- Conservation Reserve Enhancement Program (CREP)
- Have you participated in CREP? If so, what did you like about the program? What could be improved?
- If you haven't participated, why not? What are your thoughts on the strengths and weaknesses of the program?
- What's your opinion about the effectiveness of CREP?
- Do you think more land should be enrolled in CREP?
- Considering all of these major federal working lands and land reserve programs, to what extent do these programs as a whole guarantee the economic, agronomic, and environmental sustainability of lowa agriculture?
- If they are not sufficient, what needs to be done to attain sustainability?
